# Supplementary material for: Efficacy of Adjuvant 5-Fluorouracil Therapy for Patients with EMAST-Positive Stage II/III Colorectal Cancer
Source: PubMed Central journal article supplement (PMC4440728; doi:10.1371/journal.pone.0127591), 2015-05-21
Supplement: pone.0127591.s001.pdf [file pone.0127591.s001.pdf]

**SUPPLEMENTAL FILE**

**Efficacy of Adjuvant 5-Fluorouracil Therapy for Patients with  
EMAST-Positive Stage II/III Colorectal Cancer**

Yasushi Hamaya<sup>1</sup>, Carla Guarinos<sup>1,2</sup>, Stephanie S. Tseng-Rogenski<sup>1</sup>, Moriya Iwaizumi<sup>1</sup>,  
Ritabrata Das<sup>3</sup>, Rodrigo Jover<sup>2</sup>, Antoni Castells<sup>4</sup>, Xavier Llor<sup>5</sup>, Montserrat Andreu<sup>6</sup>, John M.  
Carethers<sup>1</sup>

*<sup>1</sup>Division of Gastroenterology, Department of Internal Medicine, University of Michigan, Ann Arbor, Michigan, United States of America; <sup>2</sup>Unidad de Gastroenterología, Hospital General Universitario de Alicante, Alicante Spain; <sup>3</sup>Biostatistics Department, School of Public Health, University of Michigan, Ann Arbor, Michigan, United States of America; <sup>4</sup>Department of Gastroenterology, Hospital Clínic, Centro de Investigación Biomédica en Red en Enfermedades Hepáticas y Digestivas (CIBERehd), IDIBAPS, University of Barcelona, Barcelona, Spain; <sup>5</sup>Division of Gastroenterology, Department of Medicine, Yale University, New Haven, Connecticut, United States of America; <sup>6</sup>Department of Gastroenterology, Hospital del Mar, IMIM (Institut Hospital del Mar d'Investigacions Mèdiques), Pompeu Fabra University, Barcelona, Catalonia, Spain*

## Supplemental Tables

**Table A. Clinical characteristics of CRC patients segregated by EMAST status, inclusive of MSI-H patients.**

|                             | All<br>(N=230) | EMAST<br>(N=102) | Non-EMAST<br>(N=128) | P value        |
|-----------------------------|----------------|------------------|----------------------|----------------|
| Age (years), median (range) | 71 (22-93)     | 71 (40-93)       | 71 (22-93)           |                |
| Sex                         |                |                  |                      |                |
| Female                      | 96             | 37               | 59                   |                |
| Male                        | 134            | 65               | 69                   | 0.141          |
| Tumor site                  |                |                  |                      |                |
| proximal                    | 95             | 42               | 53                   |                |
| distal                      | 135            | 60               | 75                   | 1.00           |
| 5-FU chemotherapy           |                |                  |                      |                |
| With                        | 94             | 34               | 60                   |                |
| Without                     | 136            | 68               | 68                   | <b>0.0433</b>  |
| Stage                       |                |                  |                      |                |
| II                          | 112            | 51               | 61                   |                |
| III                         | 118            | 51               | 67                   | 0.791          |
| MSI status                  |                |                  |                      |                |
| MSI-H                       | 30             | 20               | 10                   |                |
| MSI-L/MSS                   | 200            | 82               | 118                  | <b>0.00832</b> |

MSI=microsatellite instability; H=high; L=low, MSS=microsatellite stable

**Table B. Stratified log-rank test for comparing EMAST and 5-FU status.**

All CRCs—P-values (n=230)

|                    | 5-FU + no EMAST | no 5-FU + EMAST |
|--------------------|-----------------|-----------------|
| 5-FU + EMAST       | 0.471           | 0.0186          |
| no 5-FU + no EMAST | 0.0196          | 0.58            |

CRCs without MSI-H—P-values (n=200)

|                    | 5-FU + no EMAST | no 5-FU + EMAST |
|--------------------|-----------------|-----------------|
| 5-FU + EMAST       | 0.474           | 0.034           |
| no 5-FU + no EMAST | 0.043           | 0.68            |

## Supplemental Figures

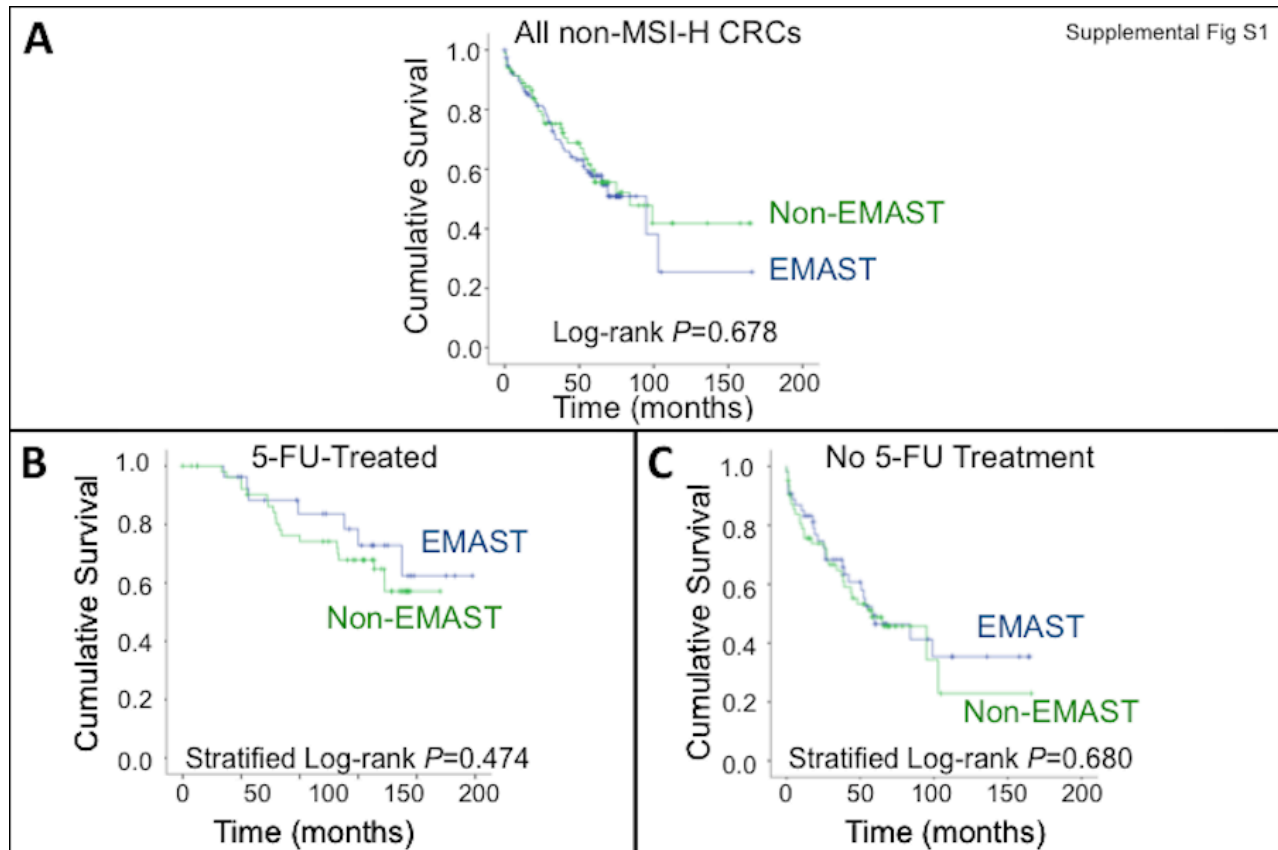

**Fig. A. Kaplan-Meier plots of cumulative overall survival in patients segregated by EMAST status.** (A) Cumulative overall survival of all patients without MSI-H separated by EMAST status ( $P=0.678$ , log-rank test). (B) Cumulative overall survival of all non-MSI-H patients receiving adjuvant 5-FU separated by EMAST status ( $P=0.474$ , stratified log-rank test). (C) Cumulative overall survival of all non-MSI patients who did not receive adjuvant 5-FU chemotherapy, separated by EMAST status ( $P=0.680$ , stratified log-rank test).

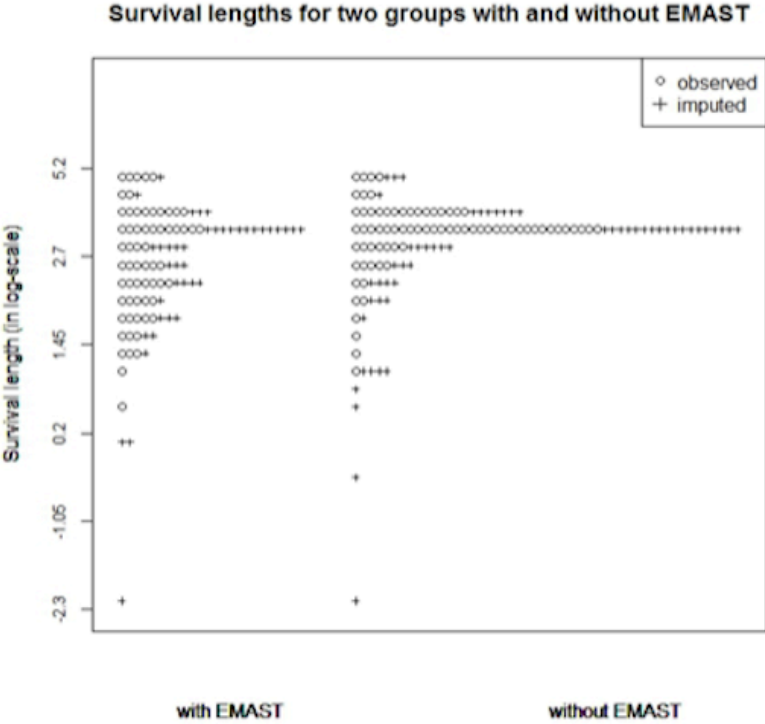

Fig. B. Alternative survival plots for EMAST and non-EMAST patients, according to Royston *et al. J Natl Cancer Inst.* 2008;100:92-97.
